# Supplementary material for: Enhancing the Properties of Water-Soluble Copolymer Nanocomposites by Controlling the Layer Silicate Load and Exfoliated Nanolayers Adsorbed on Polymer Chains
Source: MDPI journal article supplement (doi:10.3390/polym15061413), 2023-03-12
Supplement: s1 [file s1]

## Supplementary Materials

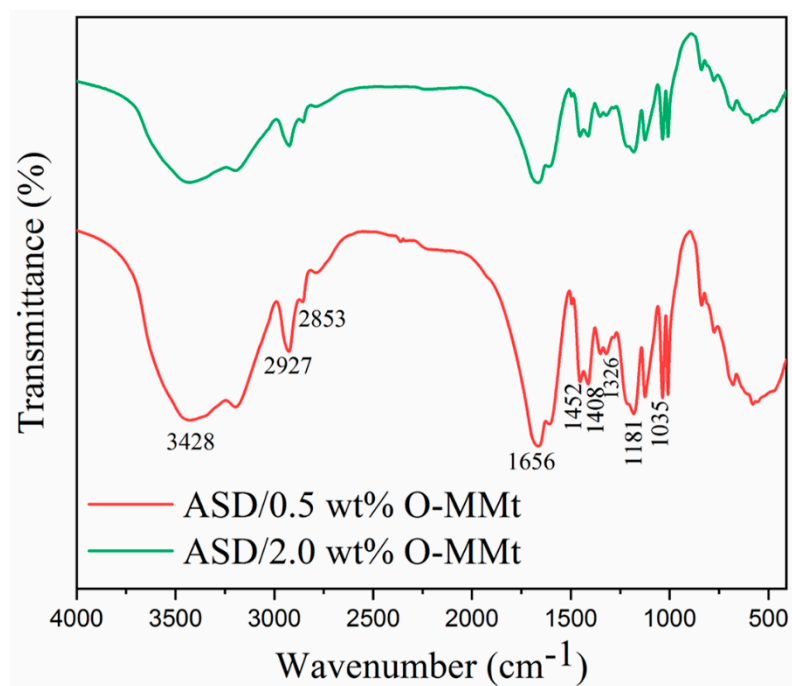

**Figure S1.** FTIR spectra of ASD/0.5 wt% O-MMt and ASD/2.0 wt% O-MMt.

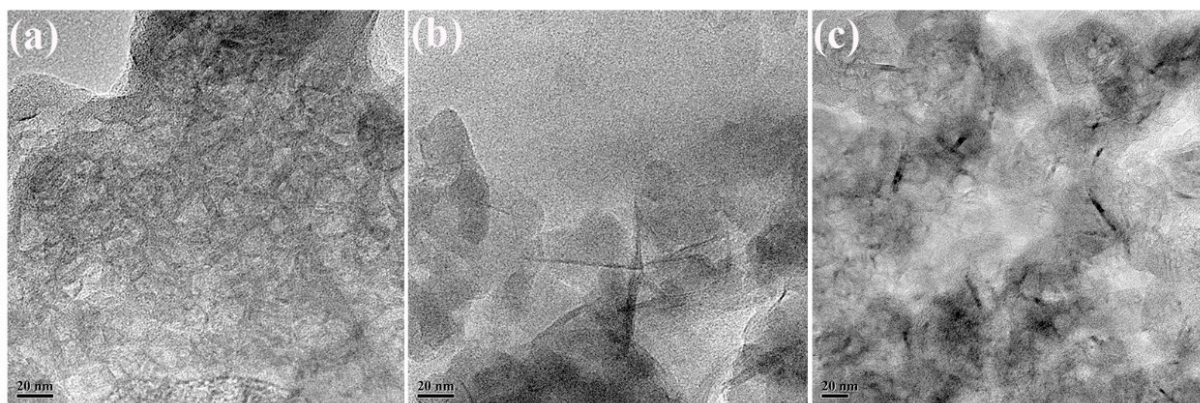

**Figure S2.** TEM images of (a)ASD, (b)ASD/0.5 wt% O-MMt and (c)ASD/2.0 wt% O-MMt.

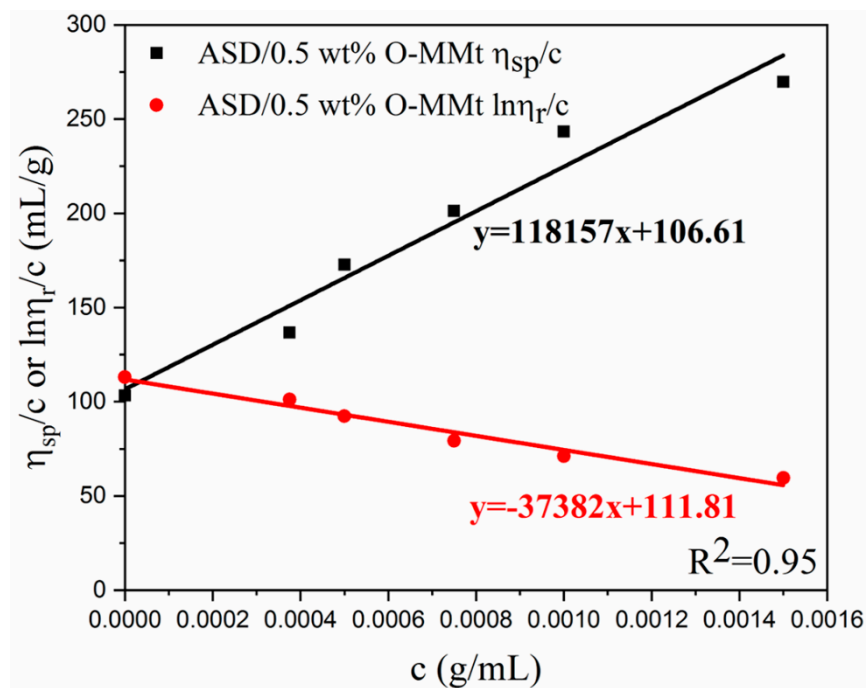

Figure S3. Relationship between  $\eta_{sp}/c$  or  $\ln\eta_r/c$  and the ASD/0.5 wt% O-MMt concentration.

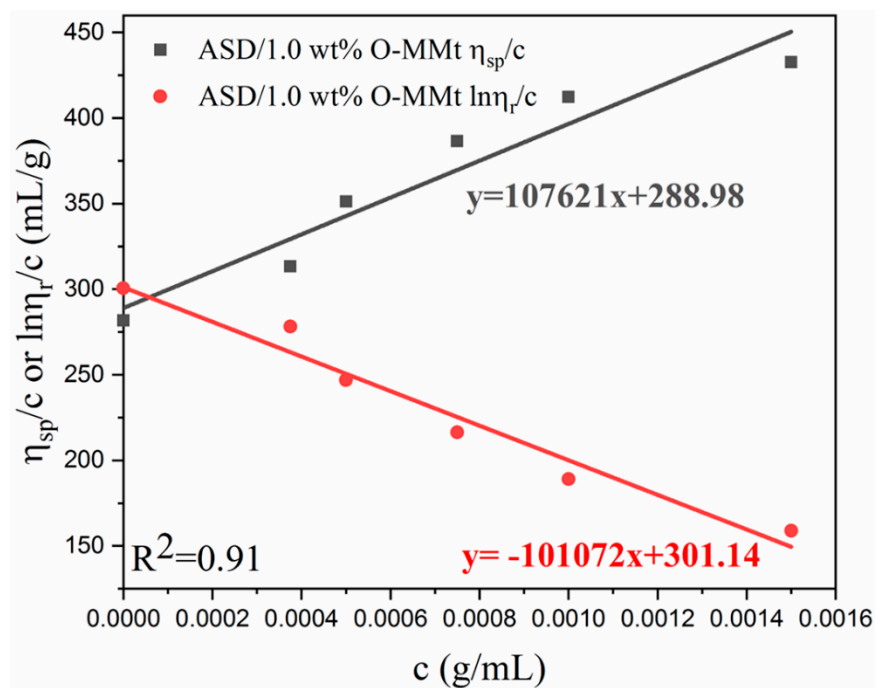

Figure S4. Relationship between  $\eta_{sp}/c$  or  $\ln\eta_r/c$  and the ASD/1.0 wt% O-MMt concentration.

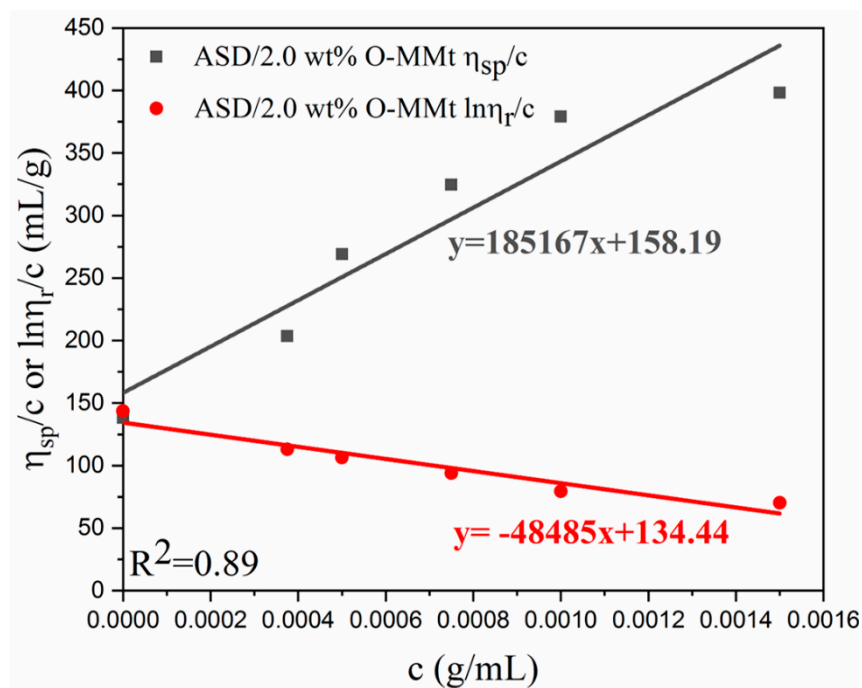

Figure S5. Relationship between  $\eta_{sp}/c$  or  $\ln\eta_r/c$  and the ASD/2.0 wt% O-MMt concentration.

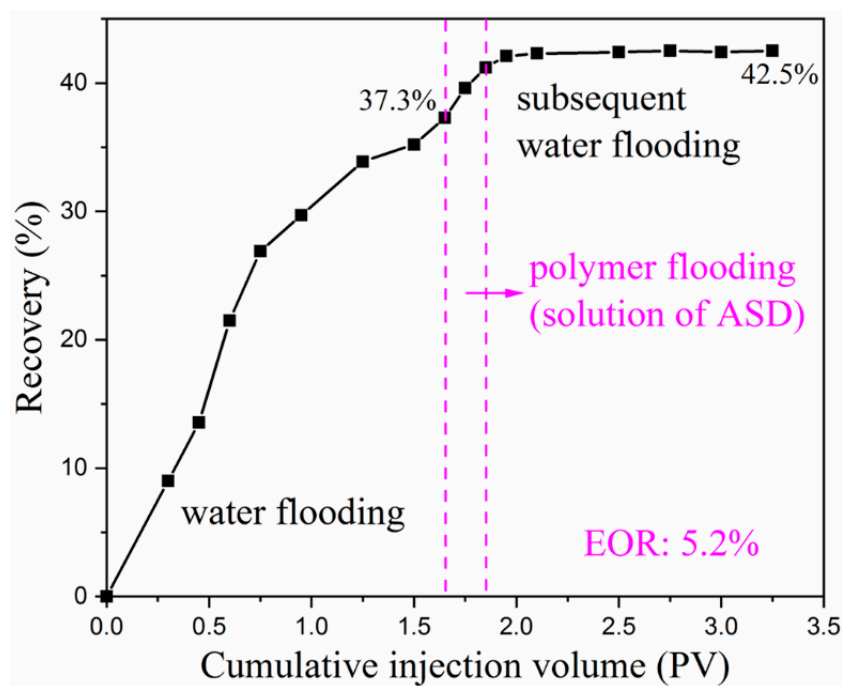

Figure S6. EOR experiments using ASD under laboratory conditions.

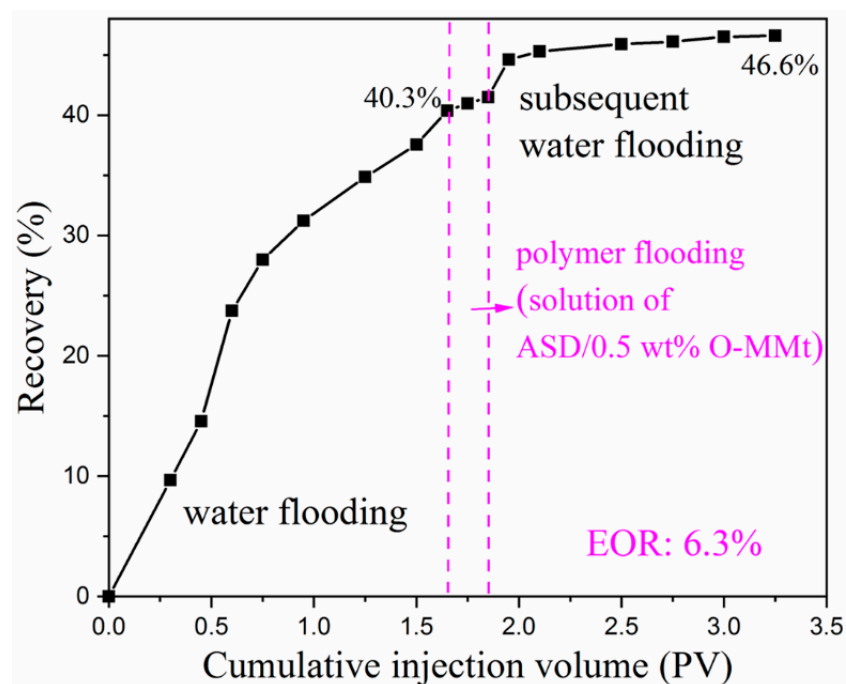

Figure S7. EOR experiments using ASD/0.5 wt% O-MMt under laboratory conditions.

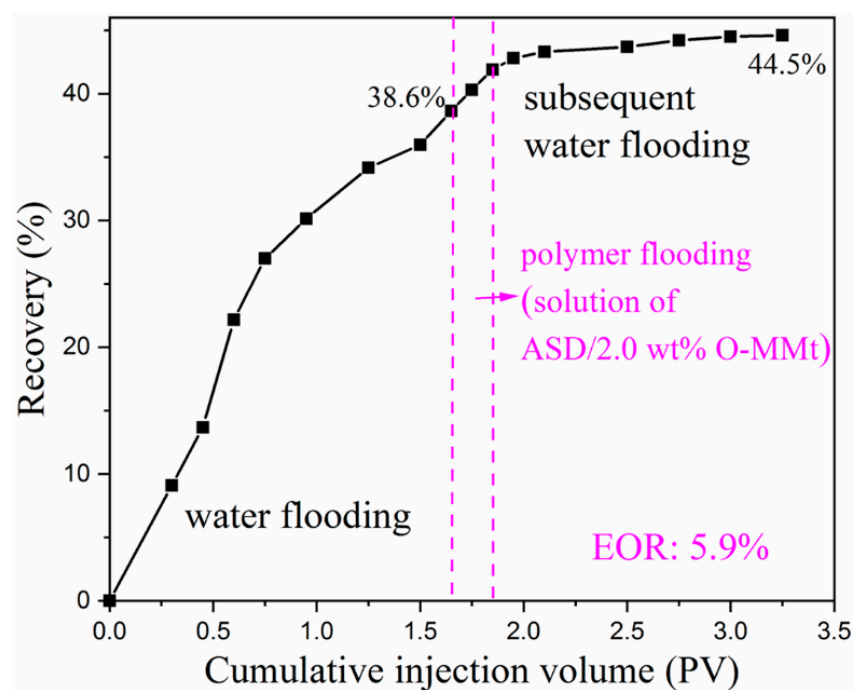

Figure S8. EOR experiments using ASD/2.0 wt% O-MMt under laboratory conditions.
